# Supplementary material for: Characterization of humoral and SARS-CoV-2 specific T cell responses in people living with HIV
Source: PubMed Central journal article supplement — bioRxiv. 2021 Feb 16:2021.02.15.431215. Preprint. [Version 1] doi: 10.1101/2021.02.15.431215 (PMC7899453; doi:10.1101/2021.02.15.431215), 2021-02-16
Supplement: media-1.pdf [file media-1.pdf]

**Table.S2 :****Fluorochrome-Conjugated Antibodies:**

| Antibodies                                               | Supplier       | Identifier   | Clone            |
|----------------------------------------------------------|----------------|--------------|------------------|
| APC anti-human IgM Antibody                              | BioLegend      | Cat # 314510 | Clone # MHM-88   |
| APC/Cyanine7 anti-human CD19 Antibody                    | BioLegend      | Cat # 363010 | Clone # SJ25C1   |
| APC/Cy7 anti-human CD197 (CCR7)                          | BioLegend      | Cat # 353212 | Clone # G043H7   |
| Brilliant Violet 605™ anti-human CD3 Antibody            | BioLegend      | Cat # 317322 | Clone # OKT3     |
| Brilliant Violet 650™ anti-human CD127 (IL-7Rα) Antibody | BioLegend      | Cat # 351325 | Clone # A019D5   |
| Brilliant Violet 650™ anti-human CD3 Antibody            | BioLegend      | Cat # 317324 | Clone # OKT3     |
| Brilliant Violet 711™ anti-human CD27 Antibody           | BioLegend      | Cat # 302833 | Clone # O323     |
| Brilliant Violet 785™ anti-human CD38 Antibody           | BioLegend      | Cat # 303530 | Clone # HIT2     |
| Alexa Fluor® 700 anti-human CD45RA Antibody              | BioLegend      | Cat # 304120 | Clone # HI100    |
| PE/Cyanine7 anti-human CD45RA Antibody                   | BioLegend      | Cat # 304126 | Clone # HI100    |
| Brilliant Violet 421™ anti-human CD279 (PD-1) Antibody   | BioLegend      | Cat # 329920 | Clone # EH12.2H7 |
| PE/Dazzle™ 594 anti-human CD4 Antibody                   | BioLegend      | Cat # 300548 | Clone # RPA-T4   |
| PE anti-human IgD Antibody                               | BioLegend      | Cat # 348204 | Clone # IA6-2    |
| APC anti-human IFN-γ Antibody                            | BioLegend      | Cat # 506510 | Clone # B27      |
| Brilliant Violet 785™ anti-human CD8a Antibody           | BioLegend      | Cat # 301046 | Clone # RPA-T8   |
| Brilliant Violet 711™ anti-human CD8a Antibody           | BioLegend      | Cat # 301044 | Clone # RPA-T8   |
| Brilliant Violet 510™ anti-human CD4 Antibody            | BioLegend      | Cat # 300546 | Clone # RPA-T4   |
| Brilliant Violet 510™ anti-human CD14 Antibody           | BioLegend      | Cat # 301842 | Clone # M5E2     |
| Brilliant Violet 510™ anti-human CD19 Antibody           | BioLegend      | Cat # 302242 | Clone # HIB19    |
| Brilliant Violet 711™ anti-human CD279 (PD-1) Antibody   | BioLegend      | Cat # 329928 | Clone # EH12.2H7 |
| Brilliant Violet 711™ anti-human PD-1 Antibody           | BioLegend      | Cat # 300232 | Clone # RPA-2.10 |
| PE/Cyanine7 anti-human CD154 Antibody                    | BioLegend      | Cat # 310832 | Clone # 24-31    |
| APC-R700 Mouse Anti-Human CD196 (CCR6)                   | BD Biosciences | Cat # 565173 | Clone # 11A9     |

|                                    |                |                  |                   |
|------------------------------------|----------------|------------------|-------------------|
| BB515 Rat Anti-Human CXCR5 (CD185) | BD Biosciences | Cat # 564624     | Clone # RF8B2     |
| BV605 Mouse Anti-Human CD56        | BD Biosciences | Cat # 562780     | Clone # NCAM16.2  |
| PC-Cy7 Mouse Anti-Human CD25       | BD Biosciences | Cat # 335824     | Clone # 2A3       |
| BB700 Mouse Anti-Human CD16        | BD Biosciences | Cat # 746199     | Clone # 3G8       |
| BB700 Mouse Anti-Human CD4         | BD Biosciences | Cat # 566393     | Clone # SK3       |
| PE-Cy™5 Mouse Anti-Human CD183     | BD Biosciences | Cat # 551128     | Clone # 1C6/CXCR3 |
| PE-Cy™5 Mouse Anti-Human HLA-DR    | BD Biosciences | Cat # 562007     | Clone # G46-6     |
| FITC Mouse Anti-Human TNF-α        | BD Biosciences | Cat # 554512     | Clone # MAb11     |
| GolgiStop (with Monensin)          | BD Biosciences | Cat # 554724     |                   |
| PerCP-eFluor 710 Anti-Human IL-2   | eBioscience    | Cat # 46-7029-42 | Clone # MQ1-17H12 |
| PerCP-eFluor 710 Anti-Human CD3    | eBioscience    | Cat # 46-0037-42 | Clone # OKT3      |
| PE Anti-Human TIGIT                | eBioscience    | Cat # 12-9500-42 | Clone # MBSA43    |

#### **Key Chemicals, Peptides, and Commercial Assays**

| Reagents                                                    | Supplier        | Identifier        |  |
|-------------------------------------------------------------|-----------------|-------------------|--|
| PepTivator SARS-CoV-2 Prot_N                                | Miltenyi Biotec | Cat # 130-126-698 |  |
| PepTivator SARS-CoV-2 Prot_M                                | Miltenyi Biotec | Cat # 130-126-702 |  |
| PepTivator CMV pp65, human                                  | Miltenyi Biotec | Cat # 130-093-438 |  |
| ProMix™ HIV Peptide Pool                                    | Proimmune       | Cat # PX-HIV      |  |
| Human IFN-γ ELISpot Kit                                     | Mabtech         | Cat # P3420-2A    |  |
| Human Anti-Cytomegalovirus IgG ELISA Kit (CMV)              | Abcam           | Cat # ab108724    |  |
| Brefeldin A                                                 | eBioscience     | Cat # 00-4506-51  |  |
| Foxp3/TF Staining Buffer Set                                | Invitrogen      | Cat # 00-5523-00  |  |
| BD Cytofix/Cytoperm™ Fixation/Permeabilization Solution Kit | BD Biosciences  | Cat # 554714      |  |
